# Supplementary material
Source: PubMed Central journal article supplement (PMC3017241)
Supplement: NIHMS250873-supplement-1.pdf [file NIHMS250873-supplement-1.pdf]

## Supplemental Figure 1

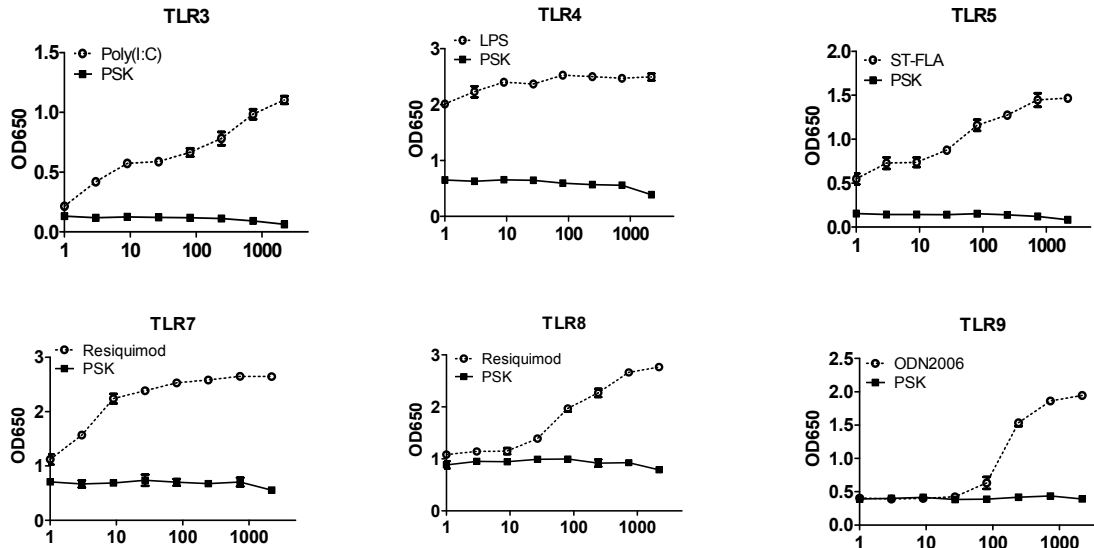

**Supplemental Figure 1.** Screening of TLR agonist activity using HEK-TLR transfectants showed that PSK does not activate TLR3, 4, 5, 7, 8, and 9. HEK-293 cells transfected with various TLRs were stimulated with PSK (0.5-1500  $\mu\text{g}/\text{ml}$ ) or the known agonist for each TLR as positive control. PSK and the control TLR agonist were added at 1:3 serial dilution with the lowest dose expressed as 1 arbitrary unit. The solid line with ■ represents the SEAP activity (OD650nm) in PSK-treated culture wells (mean $\pm$ sem of triplicate wells). The dotted line with ○ represents the SEAP activity in positive control TLR agonist-treated wells. Each line graph shows the result from a specific TLR screening assay. Arbitrary unit: PSK 1 unit = 0.5  $\mu\text{g}/\text{mL}$ ; Poly(I:C) 1 unit = 0.00457  $\mu\text{g}/\text{mL}$ ; LPS 1 unit = 0.05  $\text{ng}/\text{mL}$ ; ST-FLA 1 unit = 0.00457  $\mu\text{g}/\text{mL}$ ; Resiquimod 1 unit = 0.0216  $\mu\text{M}$ ; ODN2006 1 unit = 0.00229  $\mu\text{M}$ .
