# Supplementary material
Source: PubMed Central journal article supplement (PMC3017241)
Supplement: NIHMS250873-supplement-2.pdf [file NIHMS250873-supplement-2.pdf]

## Supplemental Figure 2

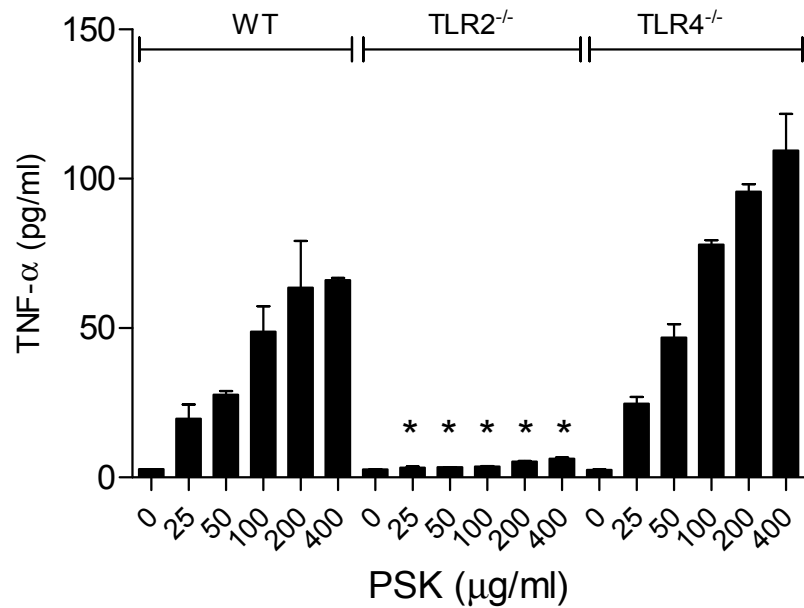

**Supplemental Figure 2.** PSK stimulated TNF- $\alpha$  secretion by splenocytes from WT and TLR4<sup>-/-</sup> mice but not from TLR2<sup>-/-</sup> mice. Splenocytes from WT, TLR2<sup>-/-</sup>, or TLR4<sup>-/-</sup> mice were treated with PSK (25 to 400  $\mu$ g/ml, 72 hour). Culture supernatant was collected at the end of the 72 hr culture period and TNF- $\alpha$  levels were measured by ELSIA. \*,  $p < 0.05$  from WT or TLR4<sup>-/-</sup> splenocytes with the same PSK treatments. Each bar represents the mean $\pm$ sem TNF- $\alpha$  level in triplicate culture wells. Experiments were repeated twice with similar results.
